# Supplementary material
Source: MDPI journal article supplement (https://www.mdpi.com/2073-4441/15/4/719)
Supplement: s1 [file s1]

## Supplementary Material

In this document, we include the experimental result of a water droplet falling on surfaces with different contact angles for  $We = 0.3$  (S1), 11 (S2), 15 (S3), 25 (S4), and 33 (S5). For each case, the results of measurements of droplet height and contact diameter are shown in fragments (b) and (c). The droplet size is  $D_0 = 2.3$  mm.

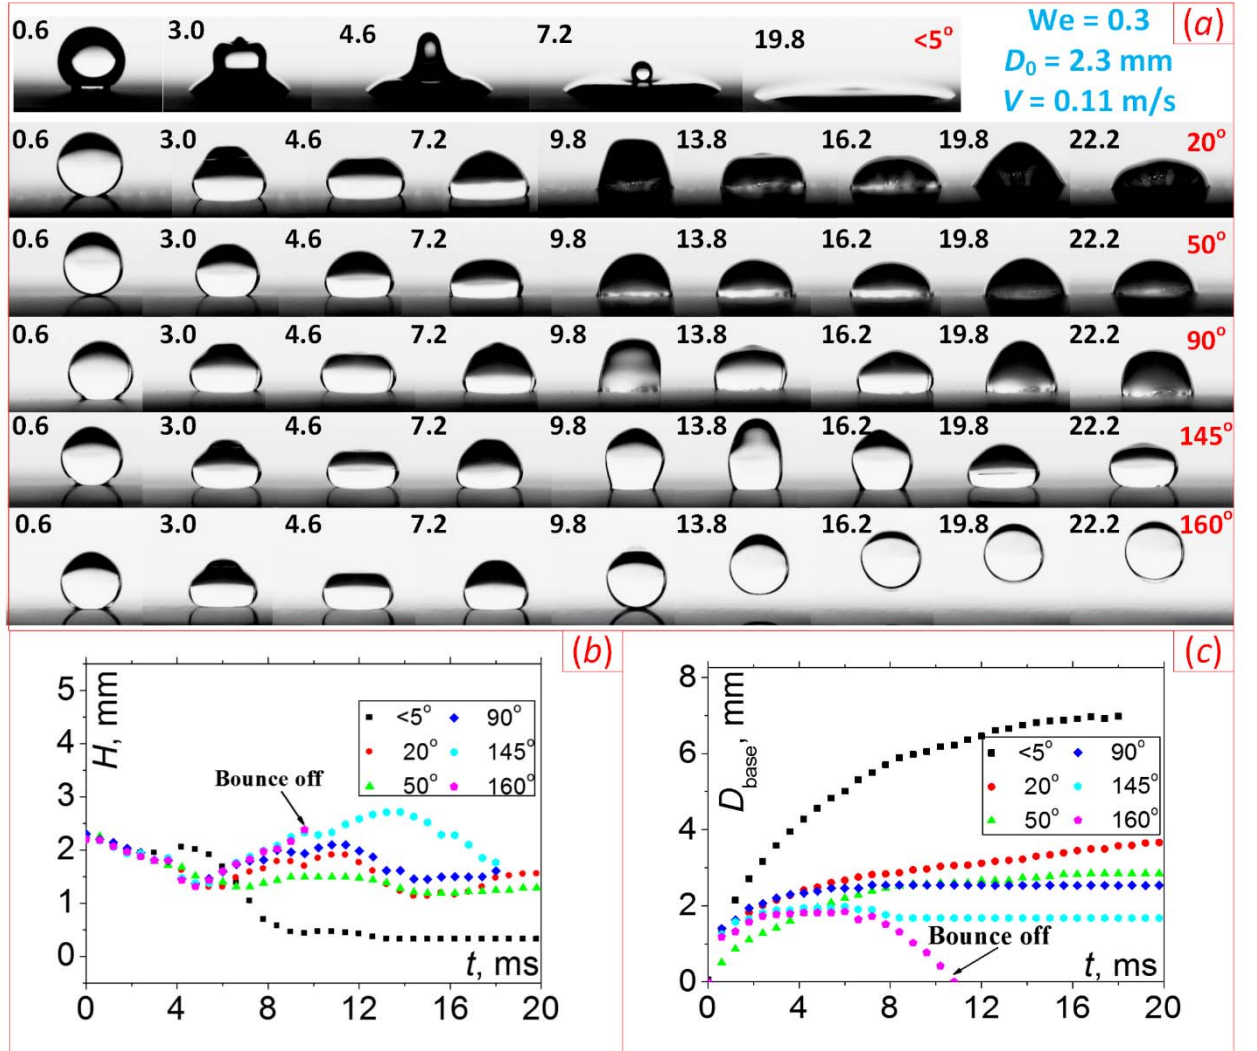

Figure S1. (a) Snapshots of droplet  $D_0 = 2.3$  mm falling on surface with different contact angle for  $We = 0.3$ , numbers are time in ms; (b) Variation of droplet height and (c) contact line diameter in time. Contact angle  $\theta$   $<5^\circ$  (■),  $20^\circ$  (●),  $50^\circ$  (▲),  $90^\circ$  (◆),  $145^\circ$  (◆),  $155^\circ$  (◆).

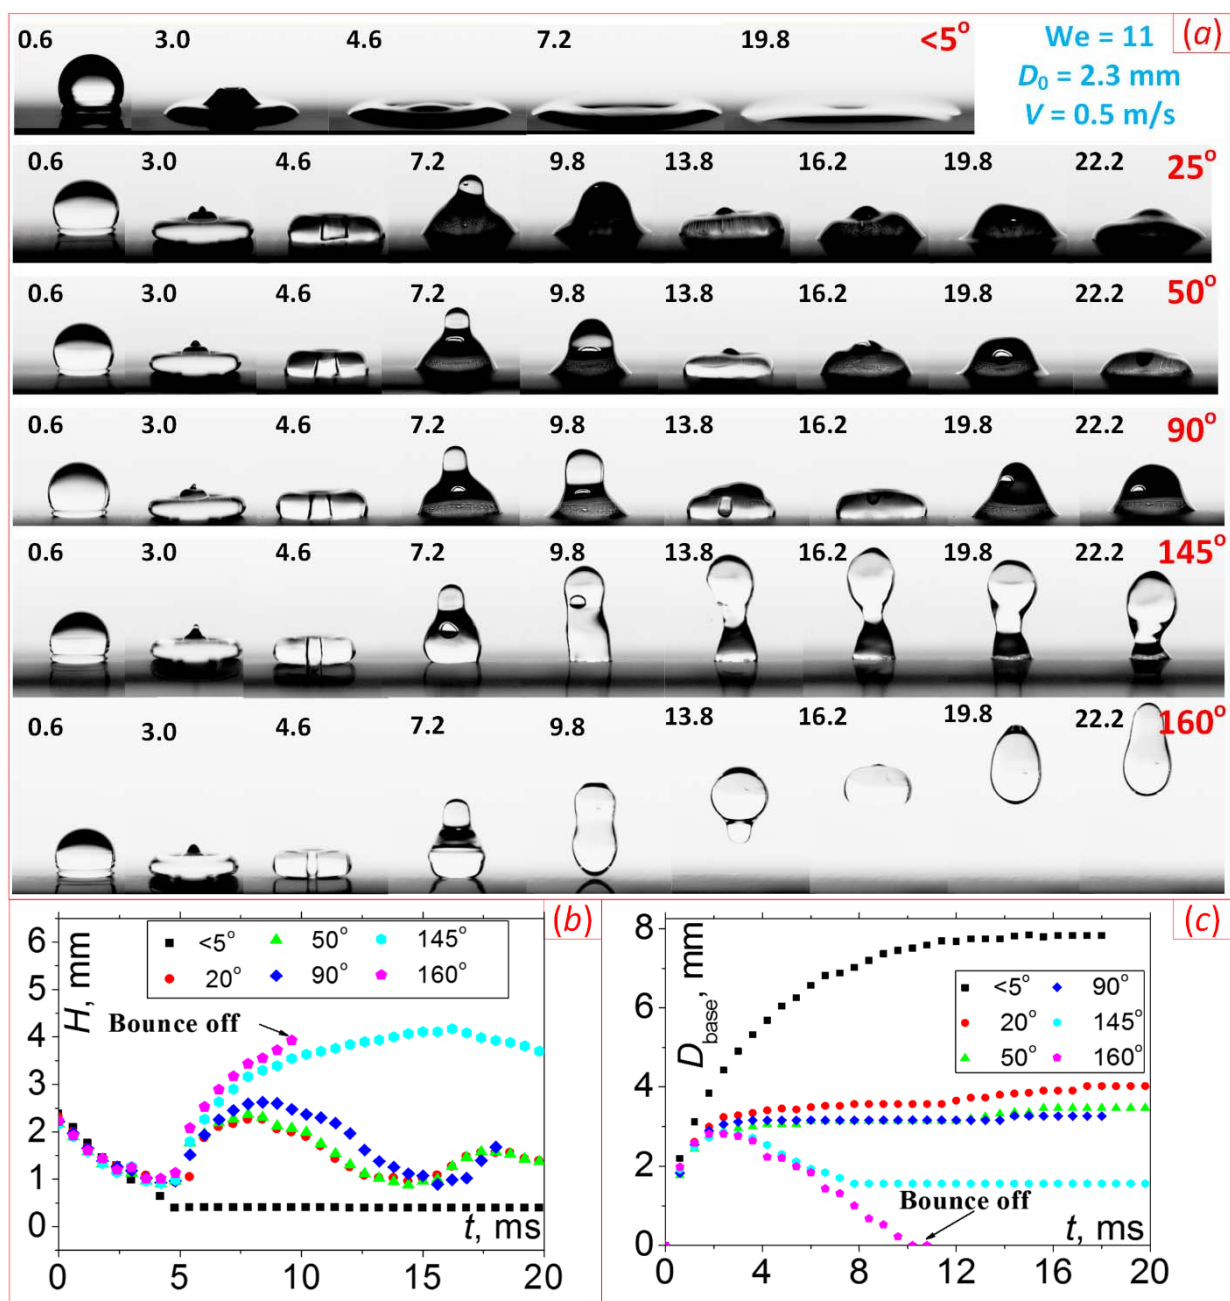

Figure S2. (a) Snapshots of droplet  $D_0 = 2.3$  mm falling on surface with different contact angle for  $We = 11$ , numbers are time in ms; (b) Variation of droplet height and (c) contact line diameter in time. Contact angle  $\theta < 5^\circ$  ( $\blacksquare$ ),  $20^\circ$  ( $\bullet$ ),  $50^\circ$  ( $\blacktriangle$ ),  $90^\circ$  ( $\blacklozenge$ ),  $145^\circ$  ( $\bullet$ ),  $155^\circ$  ( $\blacklozenge$ ).

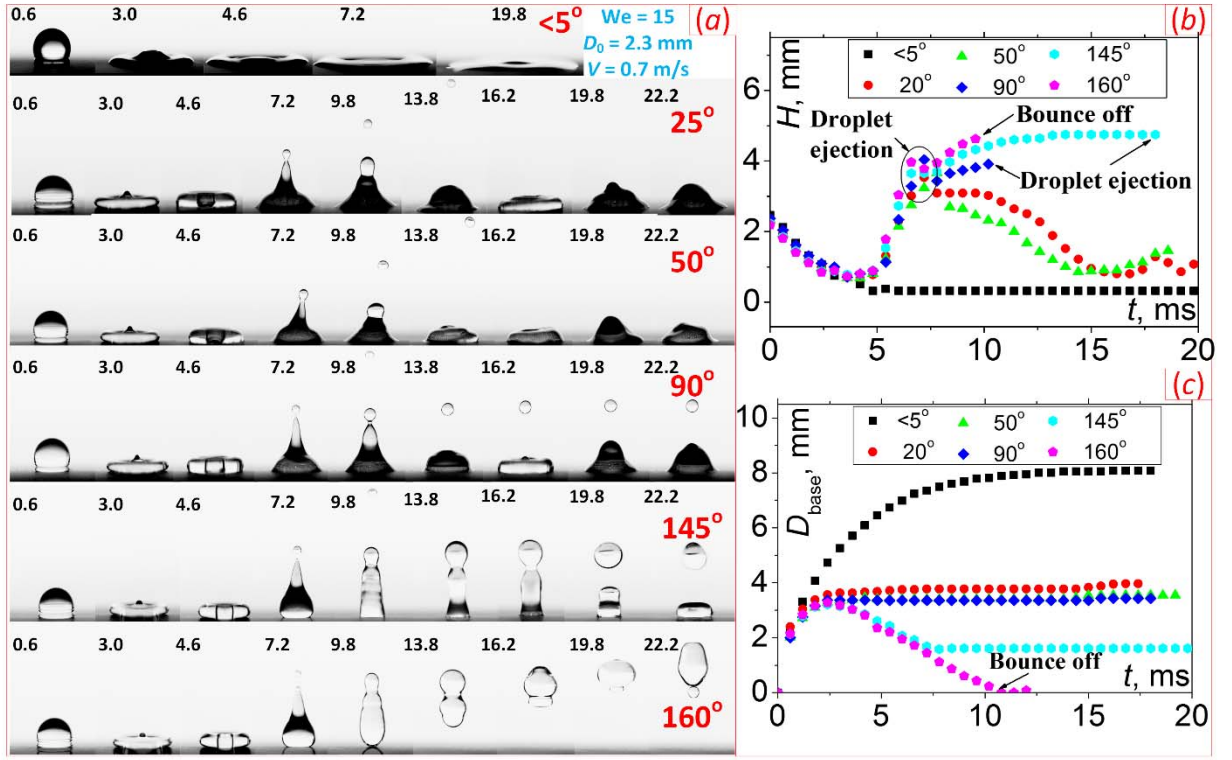

Figure S3. (a) Snapshots of droplet  $D_0 = 2.3$  mm falling on surface with different contact angle for  $We = 15$ , numbers are time in ms; (b) Variation of droplet height and (c) contact line diameter in time. Contact angle  $\theta < 5^\circ$  ( $\blacksquare$ ),  $20^\circ$  ( $\bullet$ ),  $50^\circ$  ( $\blacktriangle$ ),  $90^\circ$  ( $\blacklozenge$ ),  $145^\circ$  ( $\bullet$ ),  $155^\circ$  ( $\blacklozenge$ ).

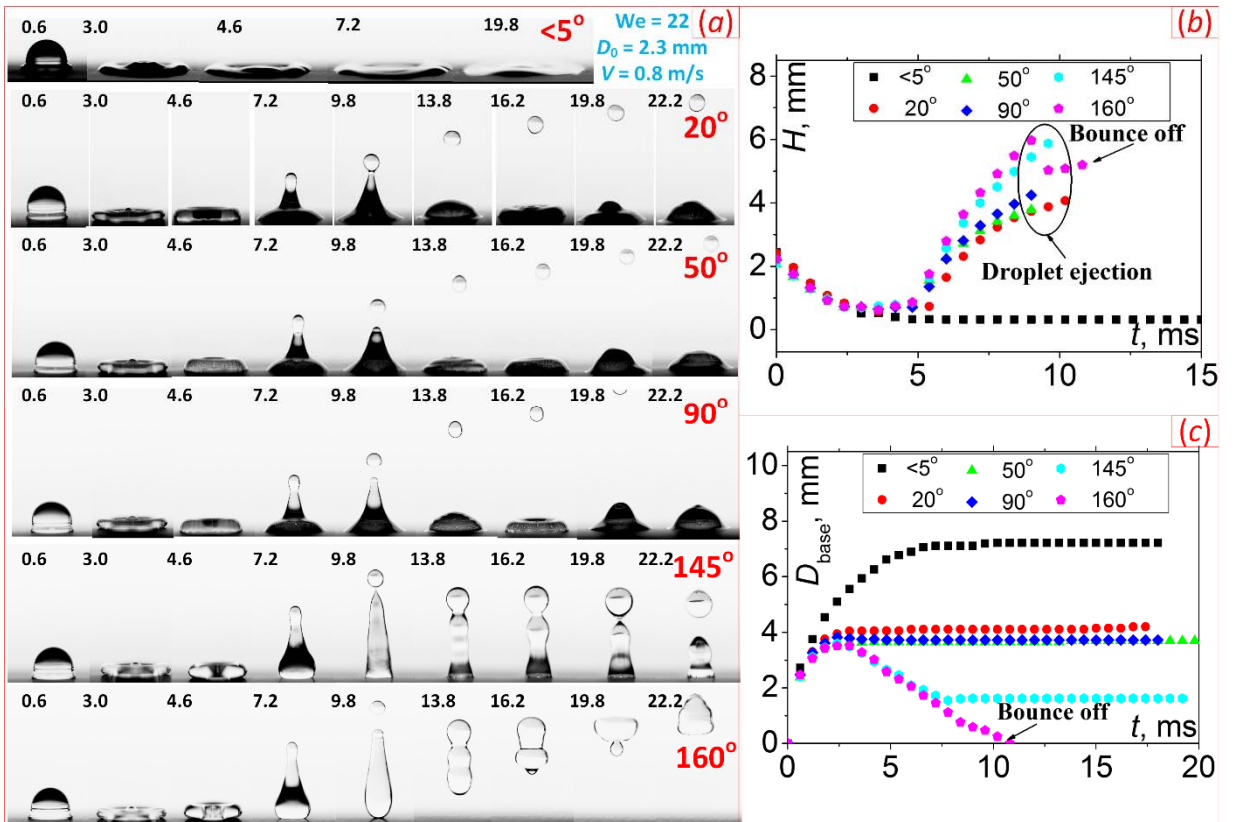

Figure S4. (a) Snapshots of droplet  $D_0 = 2.3$  mm falling on surface with different contact angle for  $We = 22$ , numbers are time in ms; (b) Variation of droplet height and (c) contact line diameter in time. Contact angle  $\theta < 5^\circ$  ( $\blacksquare$ ),  $20^\circ$  ( $\bullet$ ),  $50^\circ$  ( $\blacktriangle$ ),  $90^\circ$  ( $\blacklozenge$ ),  $145^\circ$  ( $\bullet$ ),  $155^\circ$  ( $\blacklozenge$ ).

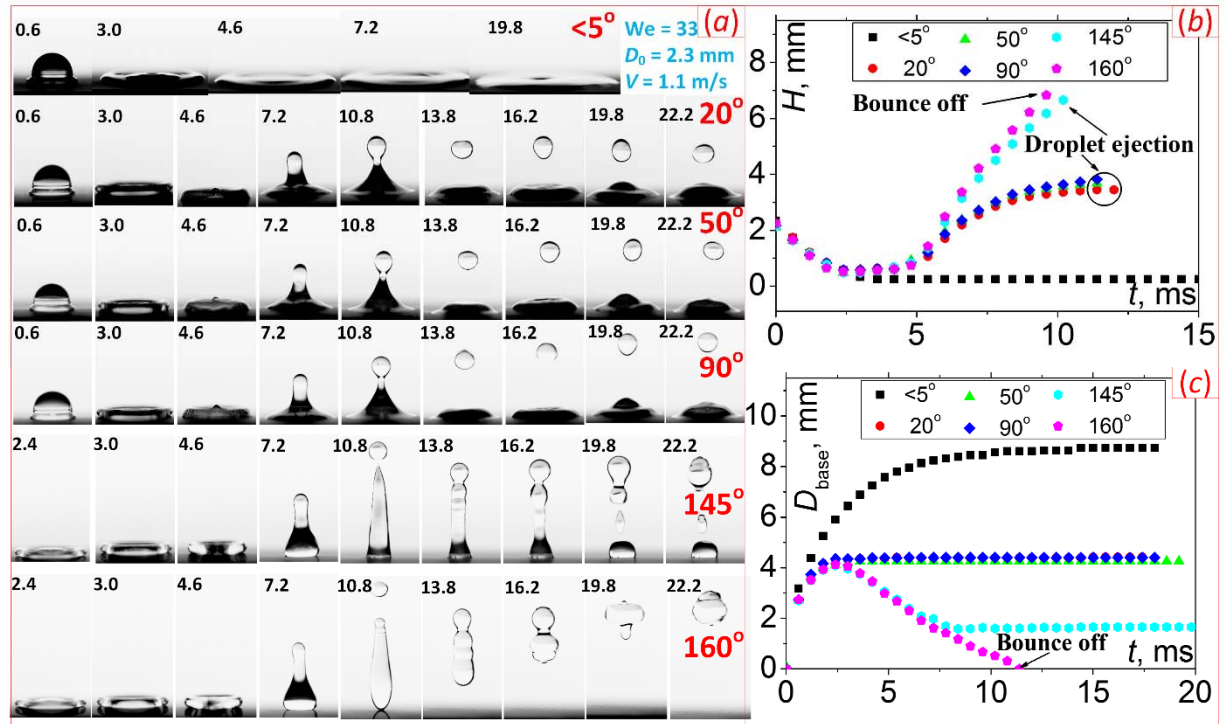

Figure S5. (a) Snapshots of droplet  $D_0 = 2.3 \text{ mm}$  falling on surface with different contact angle for  $We = 33$ , numbers are time in ms; (b) Variation of droplet height and (c) contact line diameter in time. Contact angle  $\theta < 5^\circ$  (■),  $20^\circ$  (●),  $50^\circ$  (▲),  $90^\circ$  (◆),  $145^\circ$  (●),  $155^\circ$  (●).
